# Supplementary material for: Impaired angiogenesis and tumor development by inhibition of the mitotic kinesin Eg5
Source: PubMed Central journal article supplement (PMC3926828; doi:10.18632/oncotarget.1490), 2013-10-26
Supplement: oncotarget-04-2302-s001.pdf [file oncotarget-04-2302-s001.pdf]

# Table S1

Complete list of 317 CAM genes induced by VEGF

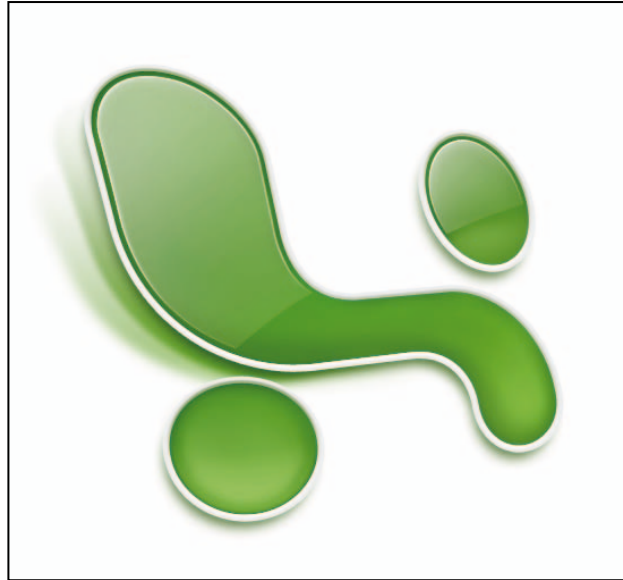

(provided as Microsoft Excel file)

The table contains the list of 317 probe sets detecting significantly up regulated transcripts in at least two out of three biological replicates. The five kinesins motor protein encoding genes are marked in red (KIF4A, KIF11, KIF15, KIF20A and KIF23).  
I = Increased.

# Figure S1

Expression of Eg5 protein in endothelial cells is stimulated by VEGF-A *in vitro* and inhibited by Avastin

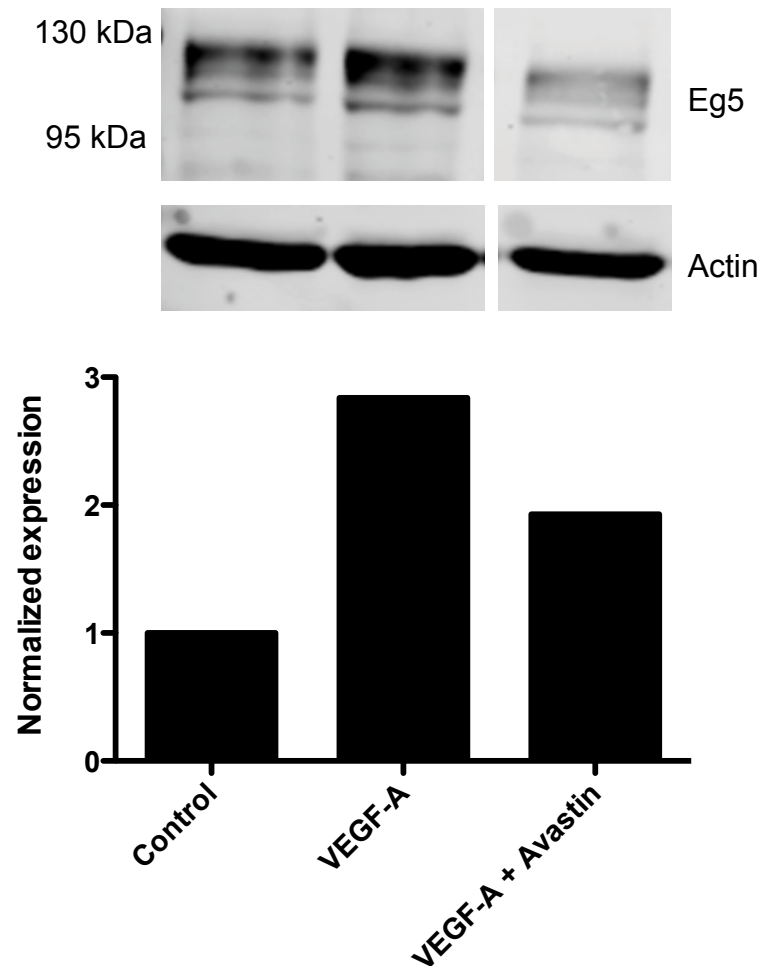

HUVECs were treated with 10 ng/ml recombinant human VEGF-A for 24 h and Eg5 protein expression is analyzed by Western Blot. Note that co-treatment with VEGF-A blocking antibody Avastin abolishes Eg5 expression.

# Table S2

## Biological themes significantly enriched in genes up regulated by VEGF

| Annotation Cluster 1 |                                          | Enrichment Score: 11.6 |        |          |                                                                                                                                                                                                                    |            |          |           |                 |            |           |          |  |  |  |  |  |
|----------------------|------------------------------------------|------------------------|--------|----------|--------------------------------------------------------------------------------------------------------------------------------------------------------------------------------------------------------------------|------------|----------|-----------|-----------------|------------|-----------|----------|--|--|--|--|--|
| Category             | Term                                     | Count                  | %      | PValue   | Genes                                                                                                                                                                                                              | List Total | Pop Hits | Pop Total | Fold Enrichment | Bonferroni | Benjamini | FDR      |  |  |  |  |  |
| SP_PIR_KEYWORDS      | mitosis                                  | 22                     | 10.68  | 5.37E-16 | KIF23, KIF11, CDC2, NUF2, NUSAP1, NDC80, CENPE, CDC20, SMC2, SMC4, NCAPD2, FAM83D, NCAPH, CCNB2, PLK1, NCAPG, NCAPG2, BUB1, BUB1B, CCNA2, HELLS, CDCA3                                                             | 206        | 183      | 19235     | 11.22526        | 1.68E-13   | 1.68E-13  | 7.44E-13 |  |  |  |  |  |
| GOTERM_BP_FAT        | GO:0048285~organelle fission             | 25                     | 12.136 | 1.53E-15 | KIF23, FAM83D, NCAPH, NCAPG2, NCAPG, BUB1, CCNA2, HELLS, CDCA3, MSH6, KIF11, OPB1, CDC2, KIF15, NUF2, TPX2, NUSAP1, CENPE, NDC80, CDC20, SMC2, NCAPD2, SMC4, CCNB2, PLK1, BUB1B                                    | 174        | 229      | 13528     | 8.487678        | 2.64E-12   | 2.64E-12  | 2.62E-12 |  |  |  |  |  |
| GOTERM_BP_FAT        | GO:0000280~nuclear division              | 24                     | 11.65  | 6.74E-15 | KIF23, KIF11, CDC2, KIF15, TPX2, NUF2, NUSAP1, NDC80, CENPE, CDC20, SMC2, SMC4, NCAPD2, FAM83D, NCAPH, CCNB2, PLK1, NCAPG, NCAPG2, BUB1, BUB1B, CCNA2, HELLS, CDCA3                                                | 174        | 220      | 13528     | 8.481505        | 1.15E-11   | 5.74E-12  | 1.14E-11 |  |  |  |  |  |
| GOTERM_BP_FAT        | GO:0007067~mitosis                       | 24                     | 11.65  | 6.74E-15 | KIF23, KIF11, CDC2, KIF15, TPX2, NUF2, NUSAP1, NDC80, CENPE, CDC20, SMC2, SMC4, NCAPD2, FAM83D, NCAPH, CCNB2, PLK1, NCAPG, NCAPG2, BUB1, BUB1B, CCNA2, HELLS, CDCA3                                                | 174        | 220      | 13528     | 8.481505        | 1.15E-11   | 5.74E-12  | 1.14E-11 |  |  |  |  |  |
| GOTERM_BP_FAT        | GO:0000087~M phase of mitotic cell cycle | 24                     | 11.65  | 9.98E-15 | KIF23, KIF11, CDC2, KIF15, TPX2, NUF2, NUSAP1, NDC80, CENPE, CDC20, SMC2, SMC4, NCAPD2, FAM83D, NCAPH, CCNB2, PLK1, NCAPG, NCAPG2, BUB1, BUB1B, CCNA2, HELLS, CDCA3                                                | 174        | 224      | 13528     | 8.330049        | 1.69E-11   | 5.65E-12  | 1.69E-11 |  |  |  |  |  |
| SP_PIR_KEYWORDS      | cell cycle                               | 30                     | 14.563 | 1.36E-14 | KIF23, E2F1, FAM83D, NCAPH, CDC45L, NCAPG2, NCAPG, BUB1, CCNA2, HELLS, CDCA3, CKAP2, RBBP4, KIF11, CDC2, NUF2, NUSAP1, CENPE, NDC80, CDC20, MCM2, SMC2, SMC4, GAK, MCM6, NCAPD2, CCNB2, RGS2, PLK1, BUB1B          | 206        | 461      | 19235     | 6.076385        | 4.10E-12   | 2.05E-12  | 1.81E-11 |  |  |  |  |  |
| GOTERM_BP_FAT        | GO:0000279~M phase                       | 27                     | 13.107 | 8.52E-14 | KIF23, FAM83D, NCAPH, NCAPG2, NCAPG, BUB1, CCNA2, HELLS, CDCA3, MSH6, KIF11, CDC2, KIF15, NUF2, TPX2, NUSAP1, CENPE, NDC80, CDC20, SMC2, SMC4, RAD51, NCAPD2, CCNB2, PLK1, TOP3A, BUB1B                            | 174        | 329      | 13528     | 6.380463        | 1.44E-10   | 3.61E-11  | 1.44E-10 |  |  |  |  |  |
| SP_PIR_KEYWORDS      | cell division                            | 23                     | 11.165 | 9.44E-14 | KIF23, KIF11, CDC2, KIF15, NUF2, NUSAP1, NDC80, CENPE, CDC20, SMC2, MCM5, SMC4, NCAPD2, FAM83D, NCAPH, CCNB2, PLK1, NCAPG, NCAPG2, BUB1, BUB1B, CCNA2, HELLS, CDCA3                                                | 206        | 264      | 19235     | 8.134837        | 2.86E-11   | 7.15E-12  | 1.26E-10 |  |  |  |  |  |
| GOTERM_BP_FAT        | GO:0007049~cell cycle                    | 39                     | 18.932 | 4.48E-13 | KIF23, E2F1, FAM83D, NCAPH, CDC45L, NCAPG2, NCAPG, PSMD1, BUB1, CCNA2, HELLS, CDCA3, CKAP2, RBBP4, KIF11, CDC2, NUF2, NUSAP1, CENPE, NDC80, CDC20, SMC2, SMC4, RAD51, MCM6, CCNB2, RGS2, PLK1, TOP3A, BUB1B, BARD1 | 174        | 776      | 13528     | 3.907394        | 7.60E-10   | 1.52E-10  | 7.56E-10 |  |  |  |  |  |
| GOTERM_BP_FAT        | GO:0022403~cell cycle phase              | 28                     | 13.592 | 2.69E-12 | KIF23, E2F1, FAM83D, NCAPH, NCAPG2, NCAPG, BUB1, CCNA2, HELLS, CDCA3, MSH6, KIF11, CDC2, KIF15, NUF2, TPX2, NUSAP1, CENPE, NDC80, CDC20, SMC2, SMC4, RAD51, NCAPD2, CCNB2, PLK1, TOP3A, BUB1B                      | 174        | 414      | 13528     | 5.25826         | 4.56E-09   | 7.60E-10  | 4.53E-09 |  |  |  |  |  |
| GOTERM_BP_FAT        | GO:0000278~mitotic cell cycle            | 26                     | 12.621 | 8.72E-12 | KIF23, E2F1, FAM83D, NCAPH, NCAPG2, NCAPG, PSMD1, BUB1, CCNA2, HELLS, CDCA3, KIF11, CDC2, KIF15, NUF2, TPX2, NUSAP1, CENPE, NDC80, CDC20, SMC2, NCAPD2, SMC4, CCNB2, PLK1, BUB1B                                   | 174        | 370      | 13528     | 5.463312        | 1.48E-08   | 2.11E-09  | 1.47E-08 |  |  |  |  |  |
| GOTERM_BP_FAT        | GO:0051301~cell division                 | 23                     | 11.165 | 2.54E-11 | KIF23, KIF11, CDC2, NUF2, NUSAP1, NDC80, CENPE, CDC20, SMC2, MCM5, SMC4, NCAPD2, FAM83D, NCAPH, CCNB2, PLK1, NCAPG, NCAPG2, BUB1, BUB1B, CCNA2, HELLS, CDCA3                                                       | 174        | 295      | 13528     | 6.06164         | 4.31E-08   | 5.39E-09  | 4.29E-08 |  |  |  |  |  |
| GOTERM_BP_FAT        | GO:0022402~cell cycle process            | 30                     | 14.563 | 1.33E-10 | KIF23, E2F1, FAM83D, NCAPH, NCAPG2, NCAPG, PSMD1, BUB1, CCNA2, HELLS, CDCA3, MSH6, KIF11, CDC2, KIF15, TPX2, NUF2, NUSAP1, CENPE, NDC80, CDC20, SMC2, SMC4, RAD51, NCAPD2, CCNB2, PLK1, TOP3A, BUB1B, BARD1        | 174        | 565      | 13528     | 4.128166        | 2.26E-07   | 2.51E-08  | 2.24E-07 |  |  |  |  |  |
| GOTERM_CC_FAT        | GO:0000793~condensed chromosome          | 13                     | 6.3107 | 6.76E-08 | NUF2, NDC80, CENPE, SMC2, RAD51, NCAPD2, SMC4, NCAPH, BAZ1B, NCAPG, CENPC1, BUB1, BUB1B                                                                                                                            | 160        | 129      | 12782     | 8.050678        | 1.99E-05   | 9.93E-06  | 9.00E-05 |  |  |  |  |  |
| GOTERM_CC_FAT        | GO:0005819~spindle                       | 13                     | 6.3107 | 2.86E-07 | CKAP2, KIF23, KIF11, CDC2, KIF15, TPX2, NUSAP1, CDC20, CENPE, FAM83D, PLK1, BUB1, BUB1B                                                                                                                            | 160        | 147      | 12782     | 7.064881        | 8.40E-05   | 2.80E-05  | 3.80E-04 |  |  |  |  |  |
| Annotation Cluster 2 |                                          | Enrichment Score: 8.2  |        |          |                                                                                                                                                                                                                    |            |          |           |                 |            |           |          |  |  |  |  |  |
| Category             | Term                                     | Count                  | %      | PValue   | Genes                                                                                                                                                                                                              | List Total | Pop Hits | Pop Total | Fold Enrichment | Bonferroni | Benjamini | FDR      |  |  |  |  |  |
| GOTERM_BP_FAT        | GO:0000279~M phase                       | 27                     | 13.107 | 8.52E-14 | KIF23, FAM83D, NCAPH, NCAPG2, NCAPG, BUB1, CCNA2, HELLS, CDCA3, MSH6, KIF11, CDC2, KIF15, NUF2, TPX2, NUSAP1, CENPE, NDC80, CDC20, SMC2, SMC4, RAD51, NCAPD2, CCNB2, PLK1, TOP3A, BUB1B                            | 174        | 329      | 13528     | 6.380463        | 1.44E-10   | 3.61E-11  | 1.44E-10 |  |  |  |  |  |
| GOTERM_BP_FAT        | GO:0007049~cell cycle                    | 39                     | 18.932 | 4.48E-13 | KIF23, E2F1, FAM83D, NCAPH, CDC45L, NCAPG2, NCAPG, PSMD1, BUB1, CCNA2, HELLS, CDCA3, CKAP2, RBBP4, KIF11, CDC2, NUF2, NUSAP1, CENPE, NDC80, CDC20, SMC2, SMC4, RAD51, MCM6, CCNB2, RGS2, PLK1, TOP3A, BUB1B, BARD1 | 174        | 776      | 13528     | 3.907394        | 7.60E-10   | 1.52E-10  | 7.56E-10 |  |  |  |  |  |
| GOTERM_CC_FAT        | GO:0005694~chromosome                    | 23                     | 11.165 | 5.67E-08 | NUF2, NDC80, CENPE, SMC2, RAD51, NCAPD2, SMC4, NCAPH, BAZ1B, NCAPG, CENPC1, BUB1, BUB1B                                                                                                                            | 160        | 460      | 12782     | 3.994375        | 1.67E-05   | 1.67E-05  | 7.56E-05 |  |  |  |  |  |

(table continues on next page)

# Table S2

## Biological themes significantly enriched in genes up regulated by VEGF

| Annotation Cluster 3 |                                                 | Enrichment Score: 6.7 |        |          |                                                                                                                                                                                                                                                                                                |            |          |           |                 |            |           |          |
|----------------------|-------------------------------------------------|-----------------------|--------|----------|------------------------------------------------------------------------------------------------------------------------------------------------------------------------------------------------------------------------------------------------------------------------------------------------|------------|----------|-----------|-----------------|------------|-----------|----------|
| Category             | Term                                            | Count                 | %      | PValue   | Genes                                                                                                                                                                                                                                                                                          | List Total | Pop Hits | Pop Total | Fold Enrichment | Bonferroni | Benjamini | FDR      |
| UP_SEQ_FEATURE       | nucleotide phosphate-binding region:ATP         | 35                    | 16.99  | 7.84E-10 | KIF23, FES, MYO9A, N4BP2, LONP1, TEK, BUB1, TOP2A, NSF, HELLS, SYK, MSH6, KIF11, FLT1, UPF1, MYO1C, LYN, CDC2, KIF15, CENPE, MCM2, SMC2, MCM4, MCM5, SMC4, ABCG2, RADS1, MCM6, KDR, PLK1, HIPK2, BMP2K, BUB1B, JAK2, KIF20A                                                                    | 206        | 962      | 19113     | 3.375628        | 6.53E-07   | 6.53E-07  | 1.21E-06 |
| SP_PIR_KEYWORDS      | atp-binding                                     | 40                    | 19.417 | 5.88E-09 | KIF23, FES, MYO9A, N4BP2, LONP1, TEK, BUB1, TOP2A, NSF, HELLS, SYK, MSH6, KIF11, FLT1, UPF1, MYO1C, LYN, CDC2, KIF15, CENPE, MCM2, SMC2, MCM4, MCM5, SMC4, ABCG2, RADS1, MCM6, BAZ1B, PLK1, HIPK2, RAB22A, RRM1, BMP2K, TOP3A, BUB1B, JAK2, KIF20A                                             | 206        | 1326     | 19235     | 2.816705        | 1.78E-06   | 3.56E-07  | 7.87E-06 |
| SP_PIR_KEYWORDS      | nucleotide-binding                              | 45                    | 21.845 | 1.91E-08 | KIF23, GNAI2, FES, MYO9A, N4BP2, LONP1, TEK, LSG1, BUB1, RAPGEF3, TOP2A, NSF, HELLS, SYK, MSH6, KIF11, FLT1, UPF1, OPB1, MYO1C, LYN, CDC2, KIF15, RBKS, CENPE, MCM2, MCM4, SMC2, MCM5, SMC4, GAK, KDR, ABCG2, RADS1, MCM6, BAZ1B, PLK1, HIPK2, RAB22A, RRM1, BMP2K, TOP3A, BUB1B, JAK2, KIF20A | 206        | 1686     | 19235     | 2.492183        | 5.79E-06   | 9.65E-07  | 2.56E-05 |
| GOTERM_MF_FAT        | GO:0030554~adenyl nucleotide binding            | 44                    | 21.359 | 1.59E-07 | KIF23, STEAP4, FES, MYO9A, N4BP2, LONP1, TEK, BUB1, RAPGEF3, TOP2A, NSF, HELLS, DUS3L, SYK, MSH6, KIF11, FLT1, UPF1, MYO1C, LYN, CDC2, KIF15, TPX2, CENPE, RBKS, MCM2, MCM4, SMC2, MCM5, SMC4, GAK, KDR, ABCG2, RADS1, MCM6, BAZ1B, PLK1, HIPK2, RRM1, BMP2K, TOP3A, BUB1B, JAK2, KIF20A       | 158        | 1577     | 12983     | 2.292656        | 5.93E-05   | 5.93E-05  | 2.20E-04 |
| GOTERM_MF_FAT        | GO:0001883~purine nucleoside binding            | 44                    | 21.359 | 2.44E-07 | KIF23, STEAP4, FES, MYO9A, N4BP2, LONP1, TEK, BUB1, RAPGEF3, TOP2A, NSF, HELLS, DUS3L, SYK, MSH6, KIF11, FLT1, UPF1, MYO1C, LYN, CDC2, KIF15, TPX2, CENPE, RBKS, MCM2, MCM4, SMC2, MCM5, SMC4, GAK, KDR, ABCG2, RADS1, MCM6, BAZ1B, PLK1, HIPK2, RRM1, BMP2K, TOP3A, BUB1B, JAK2, KIF20A       | 158        | 1601     | 12983     | 2.258288        | 9.09E-05   | 4.54E-05  | 3.36E-04 |
| GOTERM_MF_FAT        | GO:0001882~nucleoside binding                   | 44                    | 21.359 | 2.95E-07 | KIF23, STEAP4, FES, MYO9A, N4BP2, LONP1, TEK, BUB1, RAPGEF3, TOP2A, NSF, HELLS, DUS3L, SYK, MSH6, KIF11, FLT1, UPF1, MYO1C, LYN, CDC2, KIF15, TPX2, CENPE, RBKS, MCM2, MCM4, SMC2, MCM5, SMC4, GAK, KDR, ABCG2, RADS1, MCM6, BAZ1B, PLK1, HIPK2, RRM1, BMP2K, TOP3A, BUB1B, JAK2, KIF20A       | 158        | 1612     | 12983     | 2.242878        | 1.10E-04   | 3.67E-05  | 4.08E-04 |
| GOTERM_MF_FAT        | GO:0032559~adenyl ribonucleotide binding        | 42                    | 20.388 | 3.03E-07 | KIF23, FES, MYO9A, N4BP2, LONP1, TEK, BUB1, RAPGEF3, TOP2A, NSF, HELLS, SYK, MSH6, KIF11, FLT1, UPF1, MYO1C, LYN, CDC2, KIF15, TPX2, CENPE, RBKS, MCM2, MCM4, SMC2, MCM5, SMC4, GAK, KDR, ABCG2, RADS1, MCM6, BAZ1B, PLK1, HIPK2, RRM1, BMP2K, TOP3A, BUB1B, JAK2, KIF20A                      | 158        | 1497     | 12983     | 2.305396        | 1.13E-04   | 2.83E-05  | 4.19E-04 |
| GOTERM_MF_FAT        | GO:0005524~ATP binding                          | 41                    | 19.903 | 5.95E-07 | KIF23, FES, MYO9A, N4BP2, LONP1, TEK, BUB1, TOP2A, NSF, HELLS, SYK, MSH6, KIF11, FLT1, UPF1, MYO1C, LYN, CDC2, KIF15, TPX2, CENPE, RBKS, MCM2, MCM4, SMC2, MCM5, SMC4, GAK, KDR, ABCG2, RADS1, MCM6, BAZ1B, PLK1, HIPK2, RRM1, BMP2K, TOP3A, BUB1B, JAK2, KIF20A                               | 158        | 1477     | 12983     | 2.280979        | 2.22E-04   | 4.44E-05  | 8.22E-04 |
| Annotation Cluster 4 |                                                 | Enrichment Score: 5.5 |        |          |                                                                                                                                                                                                                                                                                                |            |          |           |                 |            |           |          |
| Category             | Term                                            | Count                 | %      | PValue   | Genes                                                                                                                                                                                                                                                                                          | List Total | Pop Hits | Pop Total | Fold Enrichment | Bonferroni | Benjamini | FDR      |
| GOTERM_BP_FAT        | GO:0001568~blood vessel development             | 17                    | 8.2524 | 9.84E-08 | CCM2, FLT1, LMO2, COL3A1, ELK3, PROX1, GJA5, CDH5, KDR, CDH13, MEQX2, NARG1, ID1, FOXC2, SOX18, COL1A1, SOX17                                                                                                                                                                                  | 174        | 245      | 13528     | 5.394699        | 1.67E-04   | 1.52E-05  | 1.66E-04 |
| GOTERM_BP_FAT        | GO:0001944~vasculature development              | 17                    | 8.2524 | 1.38E-07 | CCM2, FLT1, LMO2, COL3A1, ELK3, PROX1, GJA5, CDH5, KDR, CDH13, MEQX2, NARG1, ID1, FOXC2, SOX18, COL1A1, SOX17                                                                                                                                                                                  | 174        | 251      | 13528     | 5.265742        | 2.34E-04   | 1.95E-05  | 2.32E-04 |
| Annotation Cluster 5 |                                                 | Enrichment Score: 5.4 |        |          |                                                                                                                                                                                                                                                                                                |            |          |           |                 |            |           |          |
| Category             | Term                                            | Count                 | %      | PValue   | Genes                                                                                                                                                                                                                                                                                          | List Total | Pop Hits | Pop Total | Fold Enrichment | Bonferroni | Benjamini | FDR      |
| GOTERM_BP_FAT        | GO:0030261~chromosome condensation              | 8                     | 3.8835 | 1.96E-08 | NCAPH, NCAPG2, NCAPG, NUSAP1, TOP2A, SMC2, NCAPD2, SMC4                                                                                                                                                                                                                                        | 174        | 25       | 13528     | 24.87908        | 3.33E-05   | 3.33E-06  | 3.31E-05 |
| GOTERM_CC_FAT        | GO:0005694~chromosome                           | 23                    | 11.165 | 5.67E-08 | MSH6, RBKS, CENPE, UPF1, NDC80, CENPE, MCM2, SMC2, SMC4, RADS1, NCAPD2, NCAPH, BAZ1B, NCAPG, CENPC, HURD1, TOP2A, BUB1, BUB1B, BCL6, TOP2A, NUF2, NDC80, CENPE, SMC2, RADS1, NCAPD2, SMC4, NCAPH, BAZ1B, NCAPG, CENPC1, BUB1, BUB1B                                                            | 160        | 460      | 12782     | 3.994375        | 1.67E-05   | 1.67E-05  | 7.56E-05 |
| GOTERM_CC_FAT        | GO:0000793~condensed chromosome                 | 13                    | 6.3107 | 6.76E-08 | NCAPH, BAZ1B, NCAPG, CENPC1, BUB1, BUB1B                                                                                                                                                                                                                                                       | 160        | 129      | 12782     | 8.050678        | 1.99E-05   | 9.93E-06  | 9.00E-05 |
| SP_PIR_KEYWORDS      | dna condensation                                | 6                     | 2.9126 | 9.76E-08 | NCAPH, NCAPG2, NCAPG, SMC2, NCAPD2, SMC4                                                                                                                                                                                                                                                       | 206        | 12       | 19235     | 46.68689        | 2.96E-05   | 4.22E-06  | 1.31E-04 |
| GOTERM_BP_FAT        | GO:0000070~mitotic sister chromatid segregation | 8                     | 3.8835 | 3.02E-07 | NCAPH, NCAPG, NUSAP1, CENPE, NDC80, SMC2, NCAPD2, SMC4                                                                                                                                                                                                                                         | 174        | 36       | 13528     | 17.27714        | 5.13E-04   | 3.95E-05  | 5.10E-04 |
| GOTERM_CC_FAT        | GO:0000796~condensin complex                    | 5                     | 2.4272 | 3.39E-07 | NCAPH, NCAPG, SMC2, NCAPD2, SMC4                                                                                                                                                                                                                                                               | 160        | 6        | 12782     | 66.57292        | 9.97E-05   | 2.49E-05  | 4.52E-04 |
| GOTERM_BP_FAT        | GO:0000819~sister chromatid segregation         | 8                     | 3.8835 | 3.69E-07 | NCAPH, NCAPG, NUSAP1, CENPE, NDC80, SMC2, NCAPD2, SMC4                                                                                                                                                                                                                                         | 174        | 37       | 13528     | 16.81019        | 6.26E-04   | 4.47E-05  | 6.22E-04 |
| GOTERM_BP_FAT        | GO:0007076~mitotic chromosome condensation      | 6                     | 2.9126 | 3.82E-07 | NCAPH, NCAPG, NUSAP1, SMC2, NCAPD2, SMC4                                                                                                                                                                                                                                                       | 174        | 13       | 13528     | 35.88329        | 6.48E-04   | 4.32E-05  | 6.45E-04 |

Out of the 317 probe sets, which detected up regulated transcripts in VEGF-treated CAMs, 206 unique orthologs were submitted to gene ontology analysis. Note that significantly enriched GO-terms identify cell proliferation and blood vessel development as main biological processes (>5-fold enrichment, FDR<0.001).

## Table S3

In silico prediction of endothelial versus non-endothelial enrichment of human kinesin family members

| Gene symbol | Gene name                 | No. EC-EST | No. Non EC-EST | Enrichment EC-EST/Non EC-EST | FDR q-value |             |
|-------------|---------------------------|------------|----------------|------------------------------|-------------|-------------|
| KIF11       | kinesin family member 11  | 2          | 0              | -                            | 0.10        | Endothelial |
| KIF13B      | kinesin family member 13B | 3          | 2              | 6.59                         | 0.26        |             |
| KIF18A      | kinesin family member 18A | 2          | 2              | 4.39                         | 0.44        |             |
| KIF9        | kinesin family member 9   | 1          | 1              | 4.39                         | 0.57        |             |
| KIF15       | kinesin family member 15  | 1          | 1              | 4.39                         | 0.57        |             |
| KIF20A      | kinesin family member 20A | 5          | 6              | 3.66                         | 0.26        |             |
| KIF2C       | kinesin family member 2C  | 3          | 6              | 2.20                         | 0.57        |             |
| KIF13A      | kinesin family member 13A | 1          | 2              | 2.20                         | 0.62        |             |
| KIF1B       | kinesin family member 1B  | 2          | 5              | 1.76                         | 0.62        |             |
| KIF5B       | kinesin family member 5B  | 3          | 8              | 1.65                         | 0.62        |             |
| KIF3A       | kinesin family member 3A  | 1          | 3              | 1.46                         | 0.81        |             |
| KIF1C       | kinesin family member 1C  | 1          | 4              | 1.10                         | 0.94        |             |
| KIF22       | kinesin family member 22  | 2          | 14             | 1.59                         | 0.62        |             |
| KIF12       | kinesin family member 12  | 0          | 3              | -                            | 0.53        |             |
| KIF17       | kinesin family member 17  | 0          | 1              | -                            | 0.62        |             |
| KIF1A       | kinesin family member 1A  | 0          | 3              | -                            | 0.53        |             |
| KIF21A      | kinesin family member 21A | 0          | 2              | -                            | 0.57        |             |
| KIF21B      | kinesin family member 21B | 0          | 4              | -                            | 0.49        |             |
| KIF23       | kinesin family member 23  | 0          | 1              | -                            | 0.62        |             |
| KIF24       | kinesin family member 24  | 0          | 1              | -                            | 0.62        |             |
| KIF27       | kinesin family member 27  | 0          | 1              | -                            | 0.62        |             |
| KIF3B       | kinesin family member 3B  | 0          | 7              | -                            | 0.33        |             |
| KIF3C       | kinesin family member 3C  | 0          | 4              | -                            | 0.49        |             |
| KIF4A       | kinesin family member 4A  | 0          | 3              | -                            | 0.53        |             |
| KIF5C       | kinesin family member 5C  | 0          | 9              | -                            | 0.29        |             |
| KIFC1       | kinesin family member C1  | 0          | 2              | -                            | 0.57        |             |
| KIFC2       | kinesin family member C2  | 0          | 2              | -                            | 0.57        |             |
| KIFC3       | kinesin family member C3  | 0          | 8              | -                            | 0.29        |             |
|             |                           |            |                | (no restriction for q-value) |             |             |

Genes encoding for kinesins were extracted from the Affymetrix chicken GeneChip by their gene symbol (KIFxx), subjected to ortholog screen and *in silico* assignment of endothelial vs. non-endothelial enrichment. Out of 36 unique kinesin genes, 12 showed preferential endothelial expression, whereas 16 were enriched in non-endothelial cells.

# Figure S2

Expression and co-expression analysis of five VEGF-induced kinesins in various human tumors

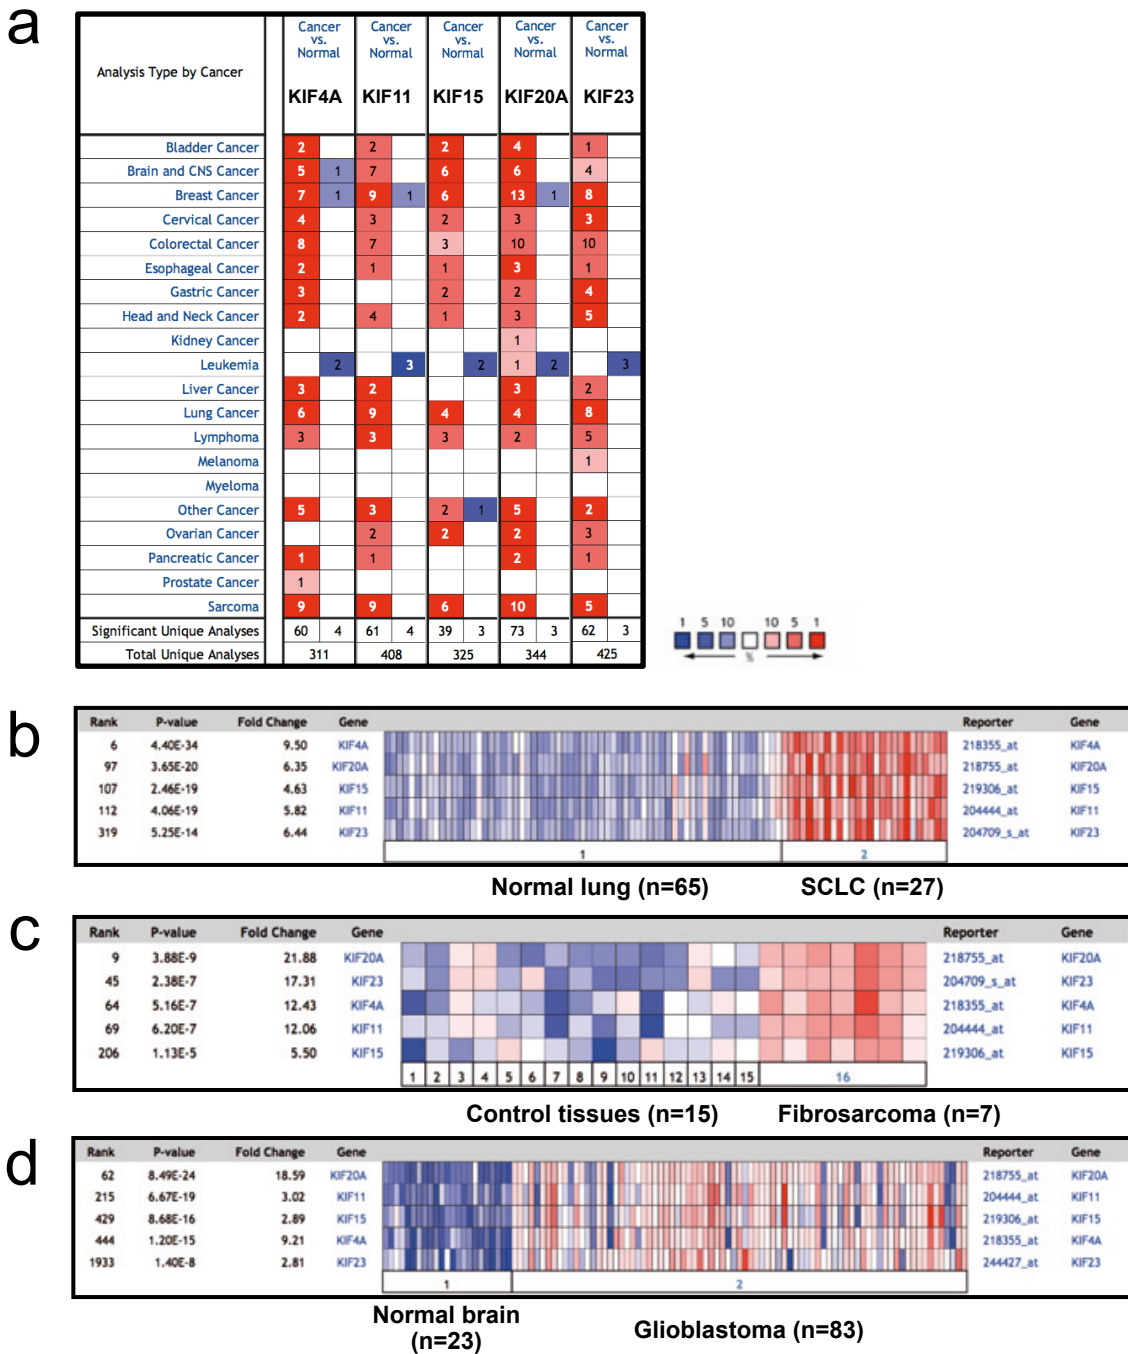

(a) Oncomine database was queried for expression of indicated kinesins in human malignancies compared to normal tissue. The numbers in the cases indicated in how many different studies significant over expression was found. Intensity of the red and blue colour indicates rank-order of the gene by over expression and under expression in cancer versus normal tissue (eg. top 1%, 5% and 10%). Co-expression of five VEGF-induced kinesins was observed in three different cancer types. In all cases, kinesins were significantly over expressed in cancer tissues. (b) SCLC = squamous cell lung carcinoma; Hou\_Lung study. (c) Fibrosarcoma; Detwiller\_sarcoma study. (d) Glioblastoma; Sun\_Brain study.

# Figure S3

Heterogeneous expression of KIF11 and KIF20A in glioblastoma

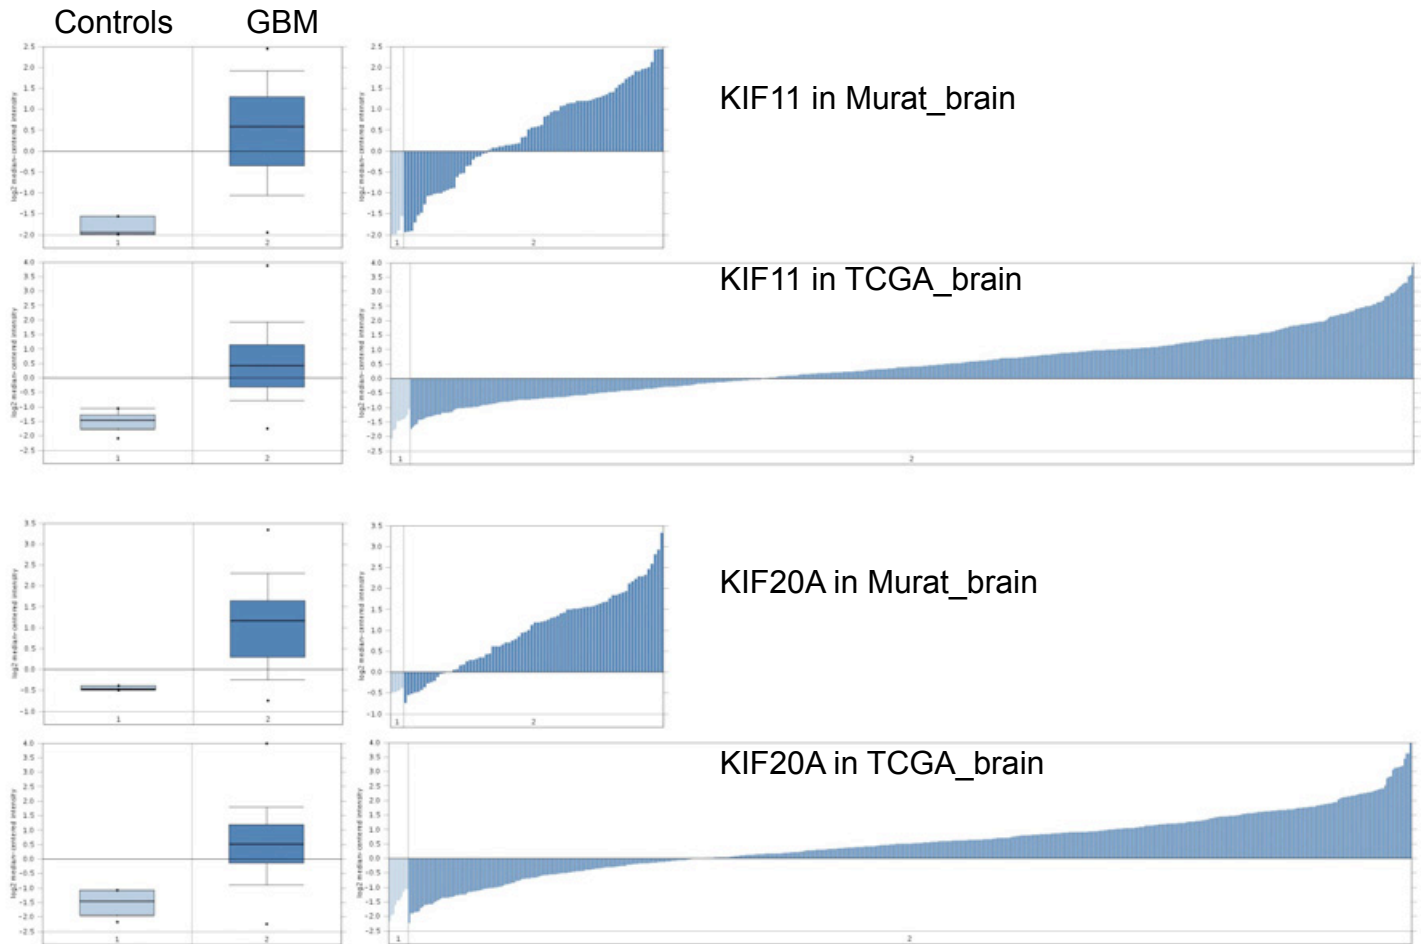

Even though over expression of KIF11 and KIF20A seems obvious from box plot presentation, visualization of the whole dataset (expression per patient) shows heterogeneity of expression in two independent glioblastoma studies (Murat\_brain: 4 controls, 80 GBMs; TCGA\_brain: 10 controls, 515 GBMs) with approximately two-thirds of patients over expressing.

# Figure S4

Vascular expression of KIF20A/Mk1p2 in normal tissues and glioblastoma

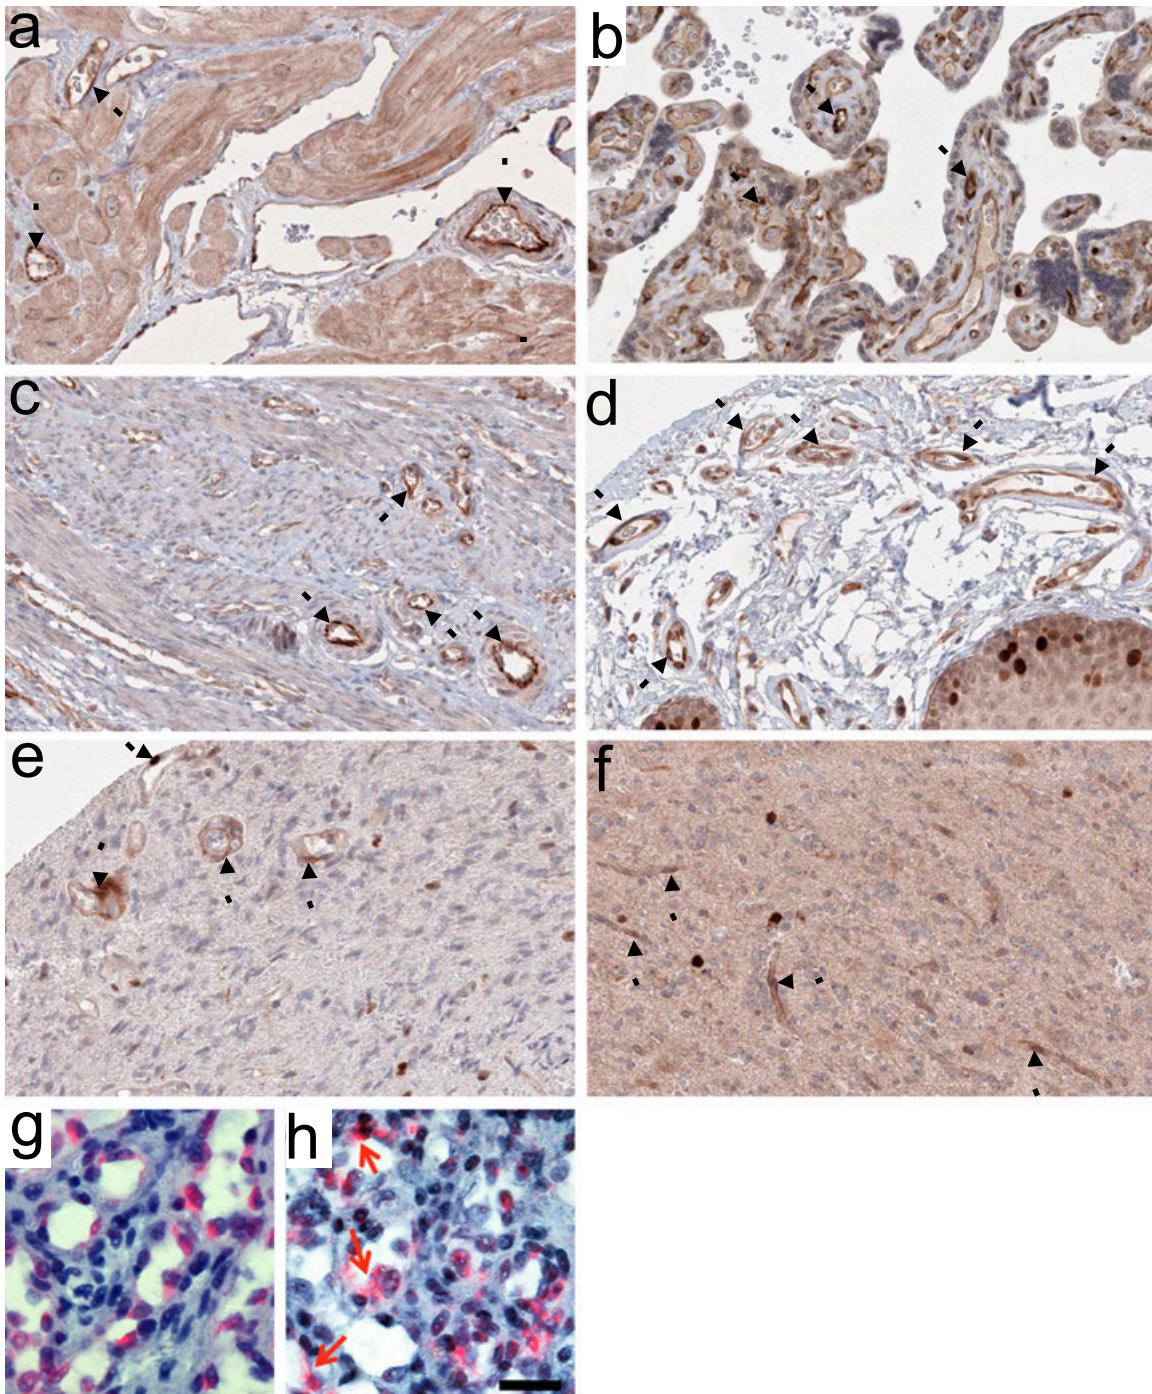

Mk1p2 protein is expressed with varying intensities in endothelial cells (black arrows) in several normal tissues: (a) heart, (b) placenta, (c) endometrium and oral mucosa (d). In glioblastoma (e, f) a diffuse background signal is found in all cells, but several tumor capillaries can be recognized by stronger Mk1p2 expression in the endothelium (black arrows). (g) Endothelial cells in tumor capillaries can be identified by in situ hybridization using a PECAM1 probe (in red). (h) KIF20A transcripts exhibit a very similar expression pattern in tumor capillaries in glioblastoma (in red, arrows point to endothelial cells). Serial sections are shown (a-f: bar = 30  $\mu$ m; g, h: bar = 30  $\mu$ m).



# Figure S5

## Co-expression of VEGF-induced kinesins in brain tumors

a

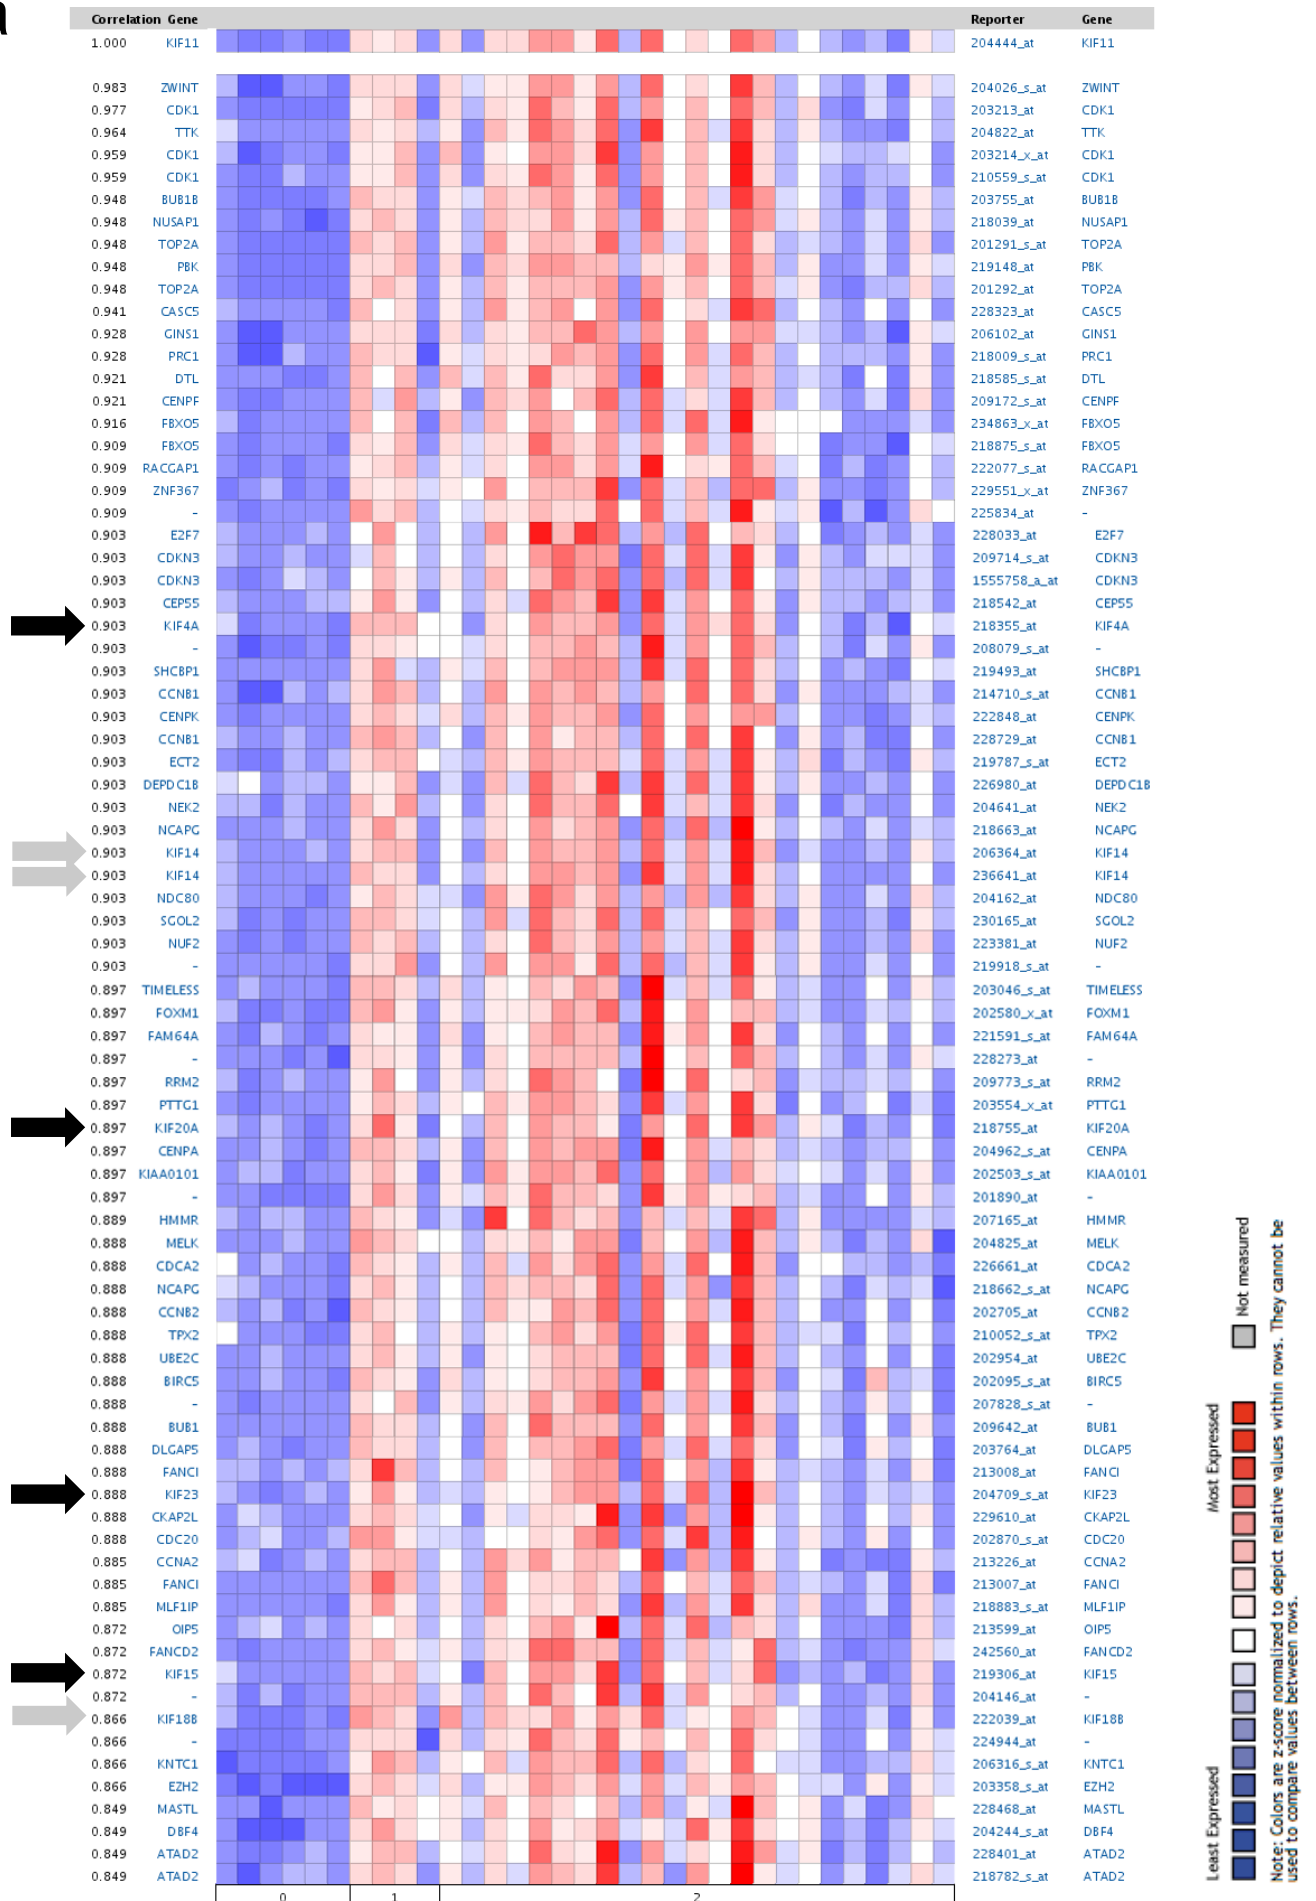

## Figure S5 (cont'd)

Co-expression of VEGF-induced kinesins in brain tumors

(a) French\_brain study. Note that all kinesins induced by VEGF are highly co-expressed (KIF11 as a bait), with correlation values ranging from 0.903 for KIF4A to 0.872 for KIF15 (black arrows). Other kinesins such as KIF14 and KIF18B also show co-regulation (grey arrows). Legend: 0: Normal brain (n=6), 1: Anaplastic Oligoastrocytoma (n=4), 2: Anaplastic Oligodendroglioma (n=23).

# Figure S5 (cont'd)

Co-expression of VEGF-induced kinesins in brain tumors

(b) Freje\_brain study: Correlation ranges from 0.905 for KIF4A to 0.71 for KIF23 (black arrows). Again, KIF14 was also co-regulated (grey arrows). Legend: 1: Anaplastic Astrocytoma (n=8), 2: Anaplastic Oligoastrocytoma (n=7), 3: Anaplastic Oligodendroglioma (n=11), 4: Glioblastoma (n=59).

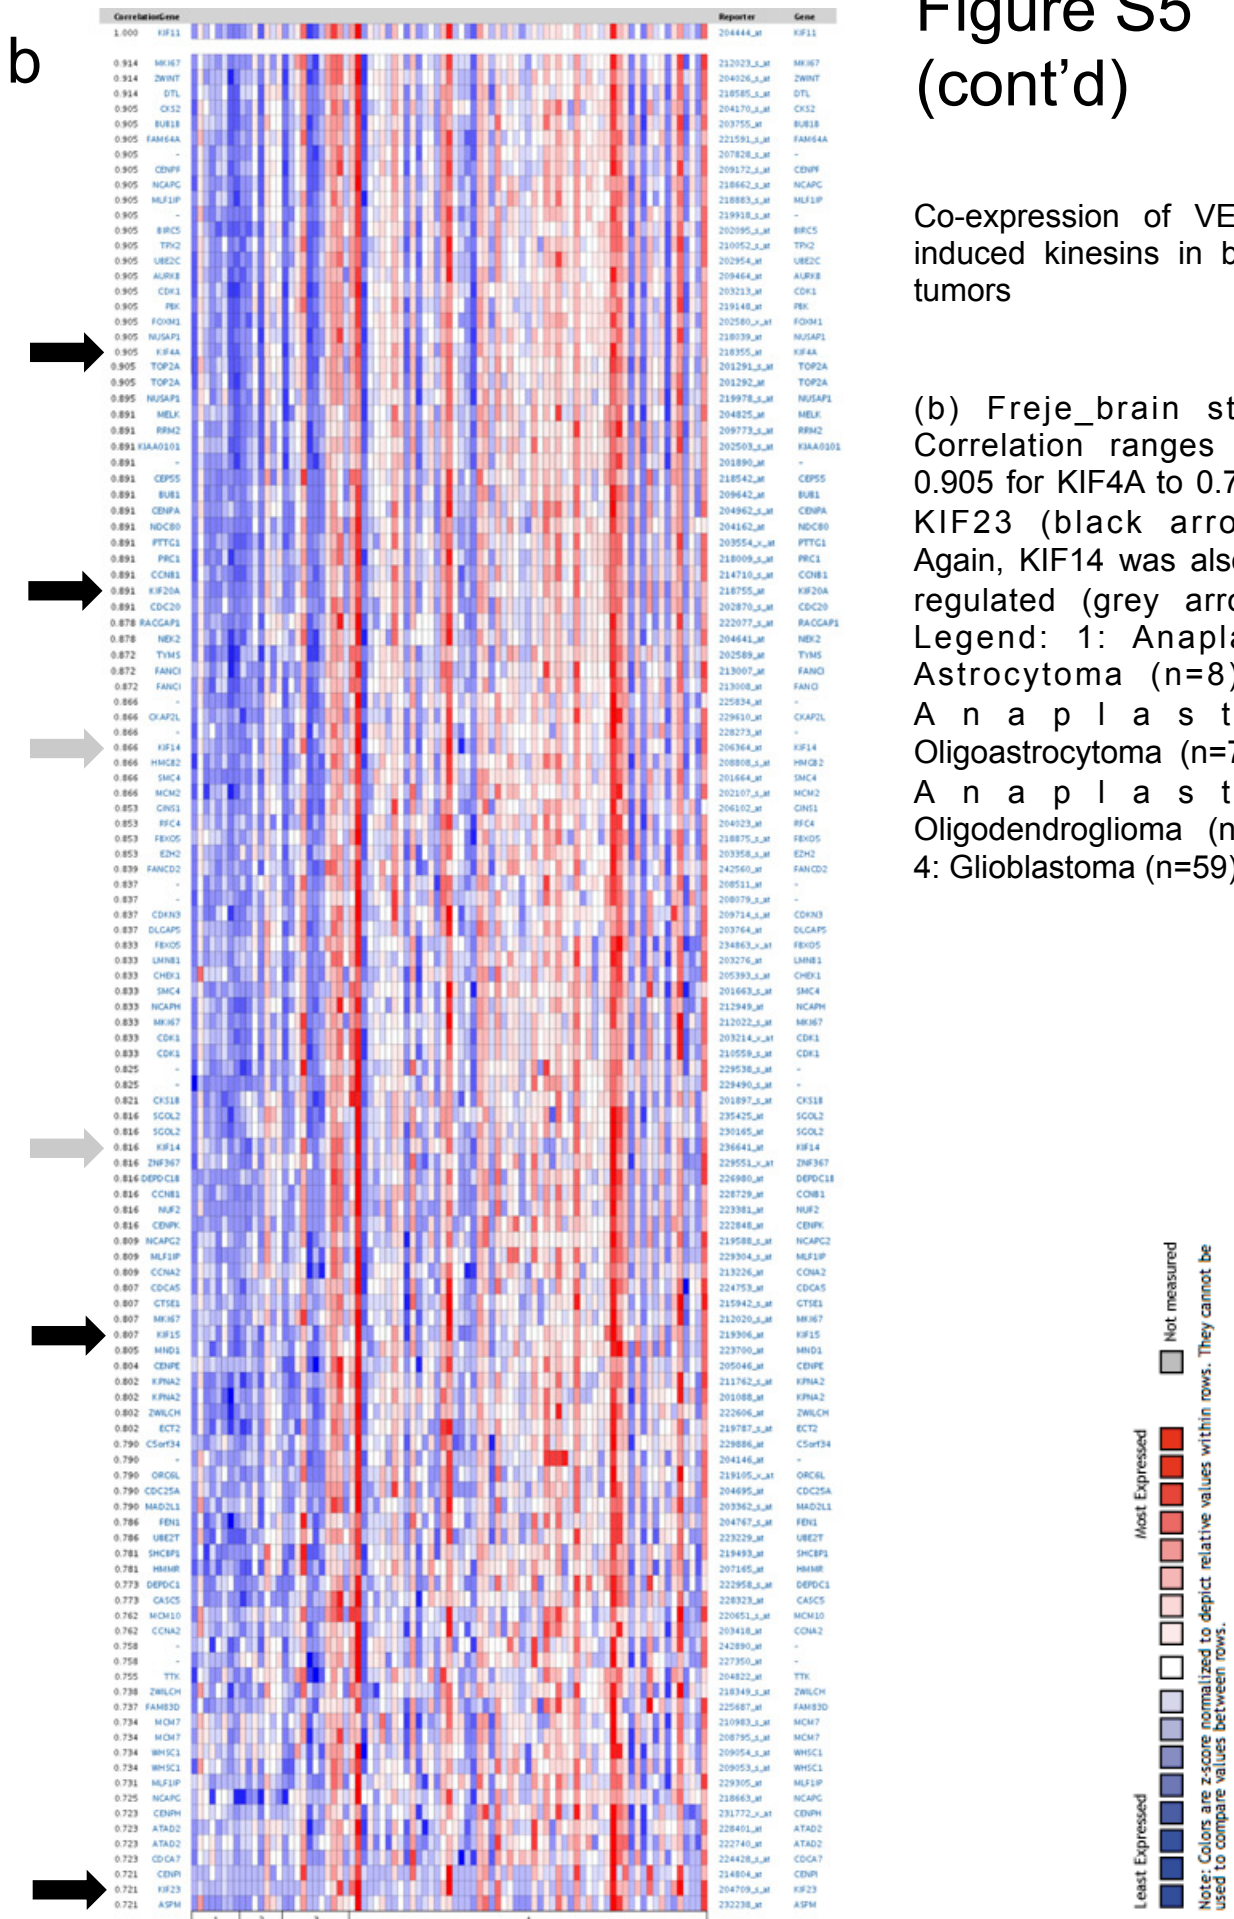

# Figure S6

Expression of VEGF-induced kinesins depends on the vascularization status in hepatocellular carcinoma (HCC)

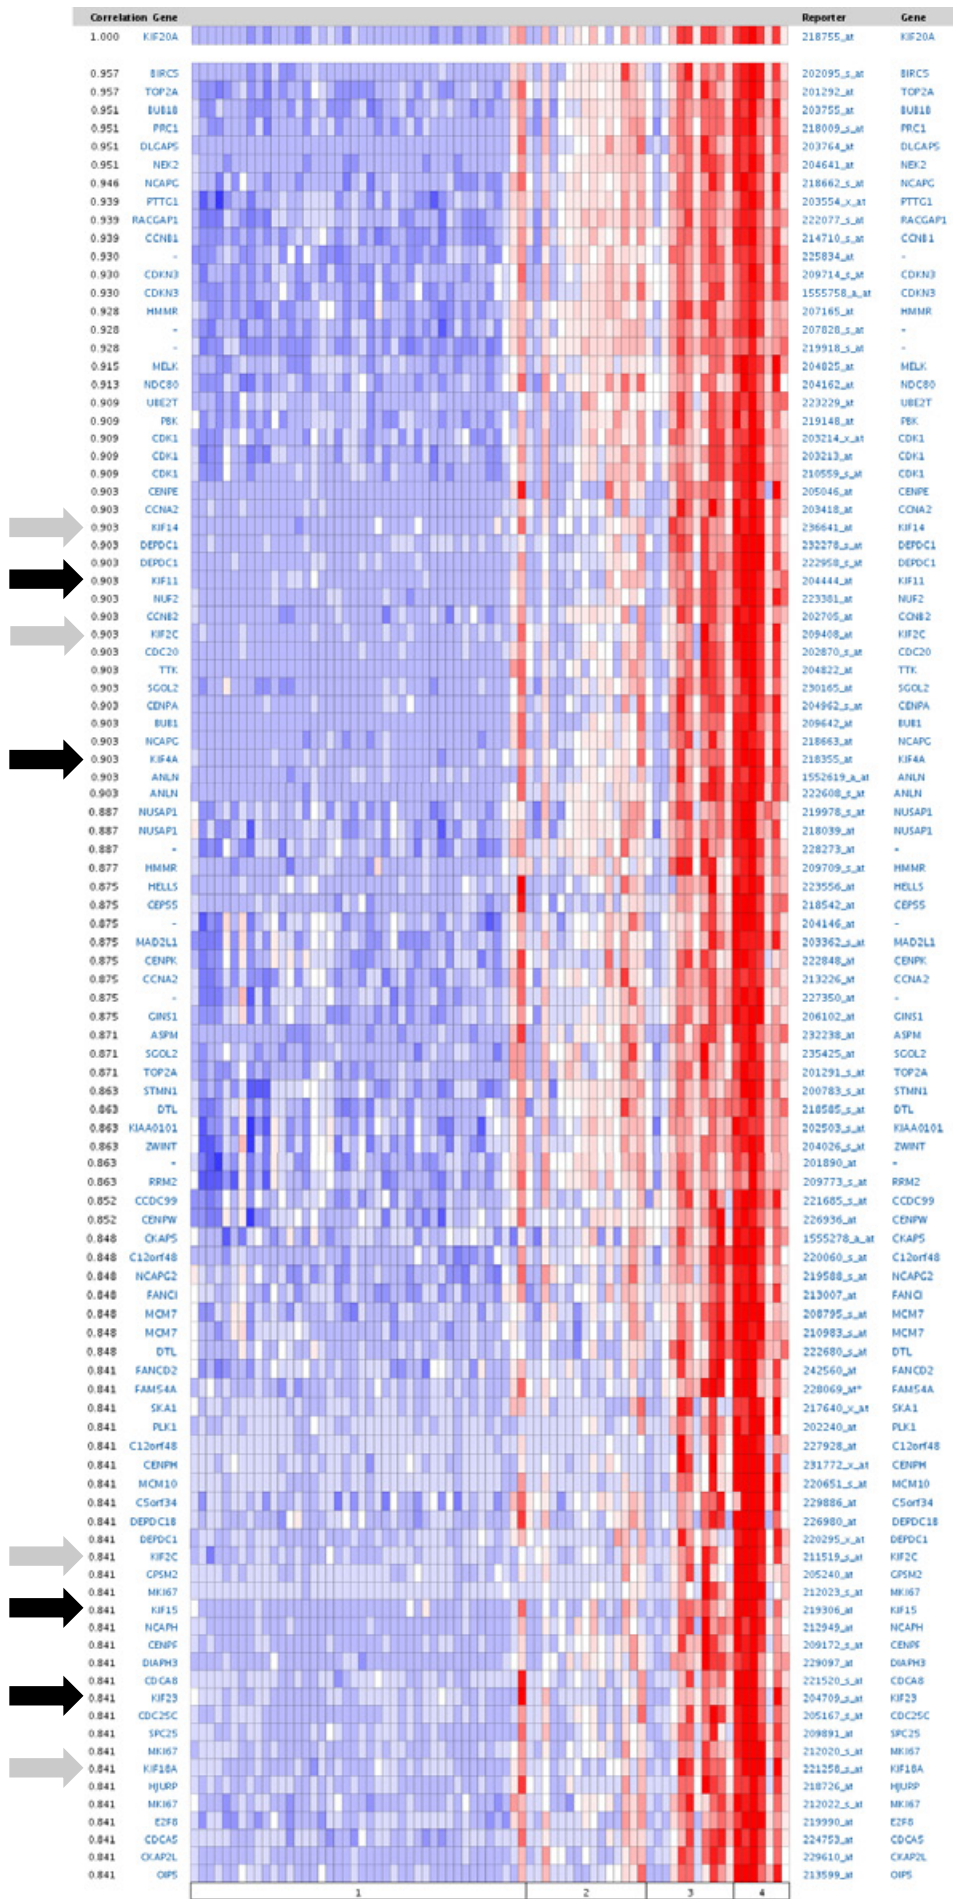

KIF11 (0.903), KIF4A (0.903) and KIF15 (0.841) expression correlates with KIF20A expression (data from the Wurmbach\_liver study). Notably, these kinesins are over expressed in highly vascularized HCC samples, compared to controls.

Legend: 0: normal liver (n=42), 1: No visible vascular invasion (n=15), 2: microscopic vascular invasion (n=11); macroscopic vascular invasion (n=7).

Most Expressed  
 Not measured  
 Least Expressed  
 Note: Colors are z-score normalized to depict relative values within rows. They cannot be used to compare values between rows.

# Figure S7

Relative expression levels of KIF11 and KIF20A transcripts in 84 human tissue and cell lines

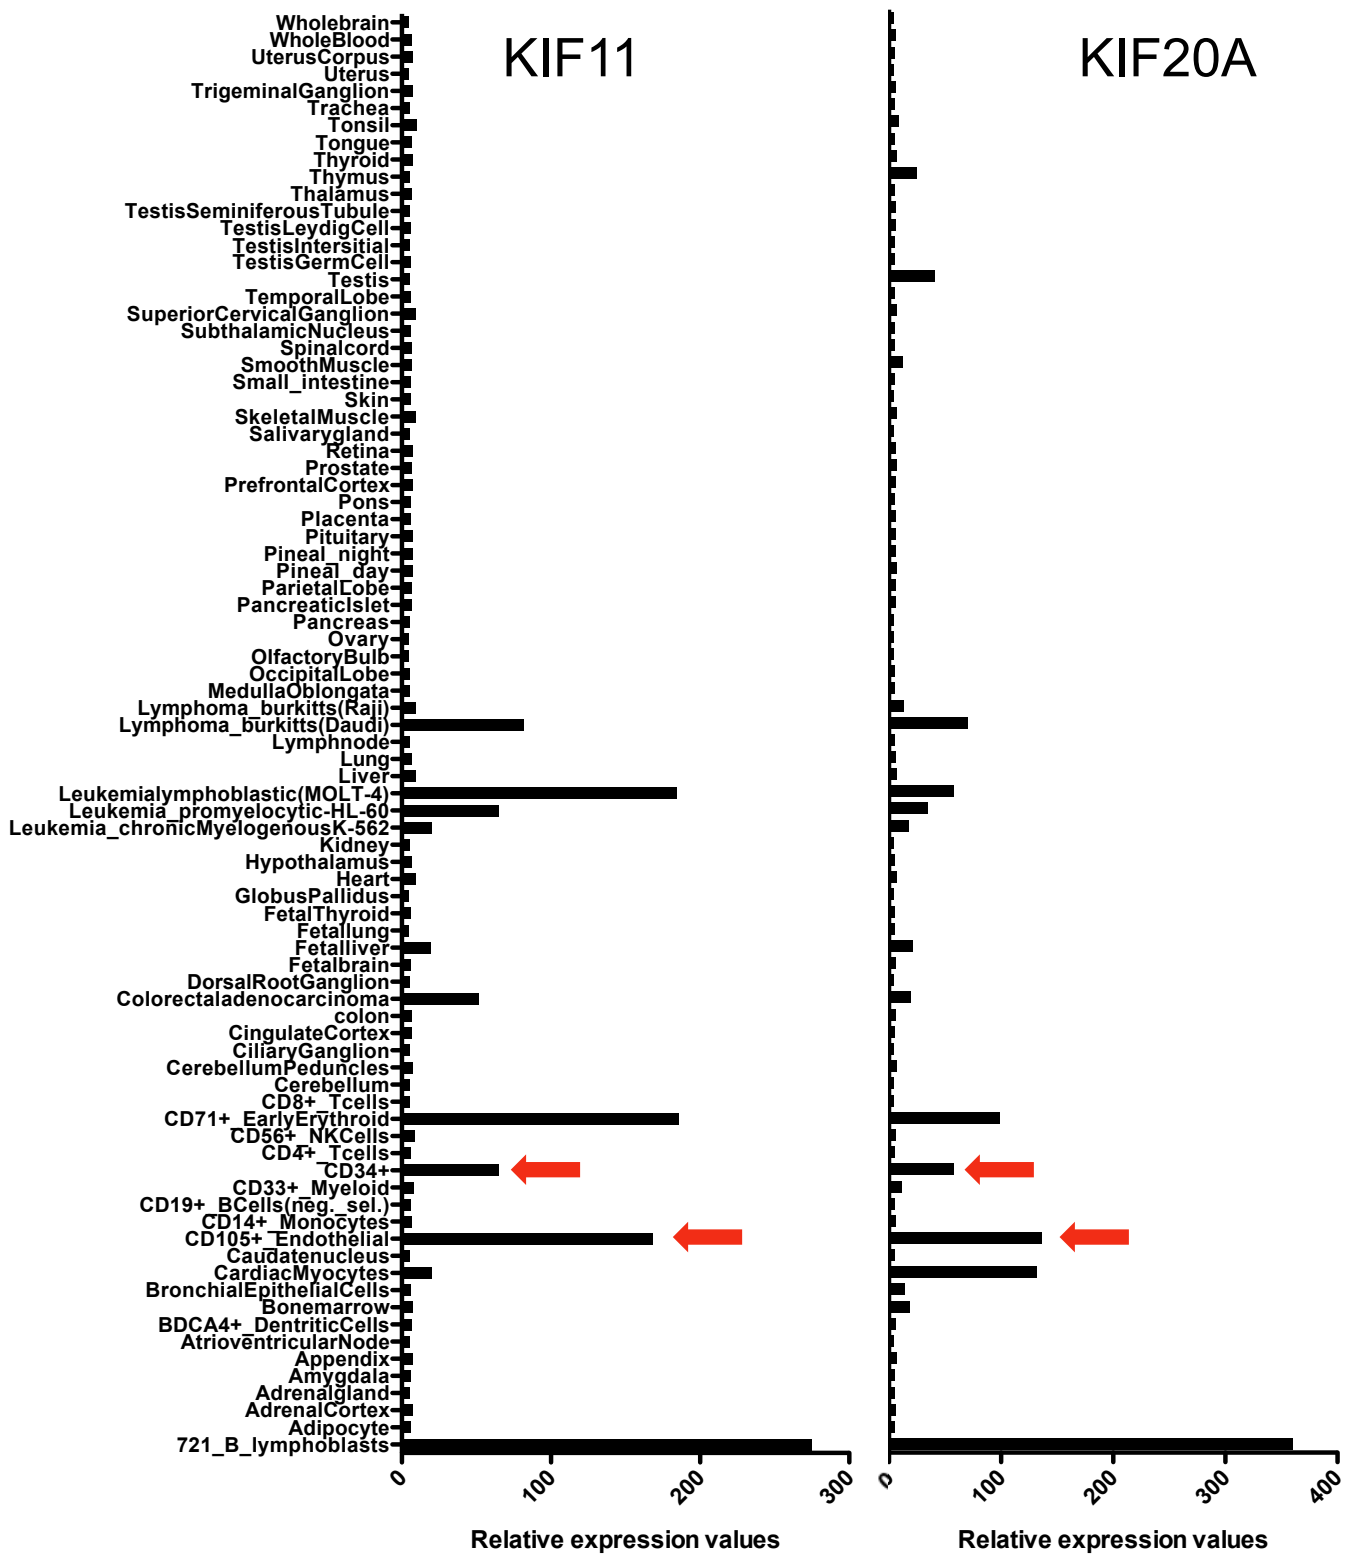

High levels of KIF11 and KIF20A transcripts were essentially found in malignant lymphoma cells and CD105+ / CD34+ endothelial cells (red arrows). There is a high correlation of KIF11 and KIF20A expression levels throughout all tissues (Spearman  $r=0.84$ ,  $P<0.0001$ ). Data were obtained using the BioGPS project.

# Figure S8

Cell proliferation is a rare occurrence in the tubulogenesis assay

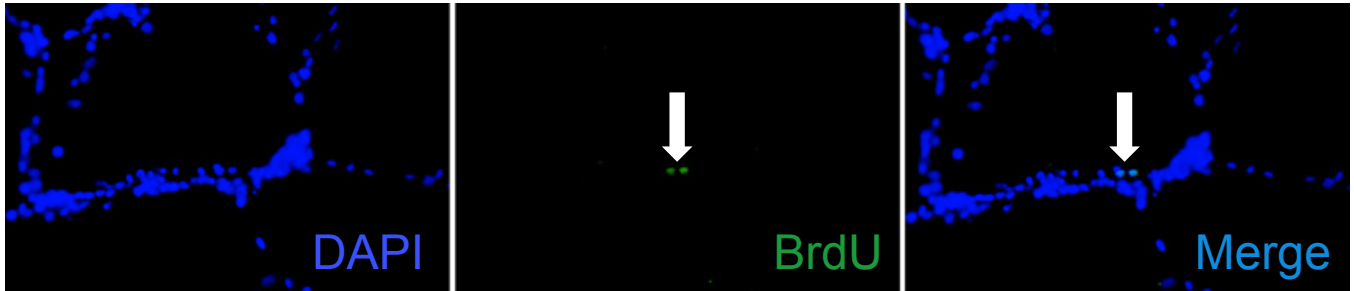

To exclude that endothelial cell proliferation occurs in our assay conditions, cells were incubated with BrdU and allowed to form tubes on matrigel for 14h30. Anti-BrdU antibody (in green) rarely detected BrdU signal in cells, one example is shown (arrows).

# Figure S9

Eg5 inhibition impairs endothelial cell adhesion and spreading

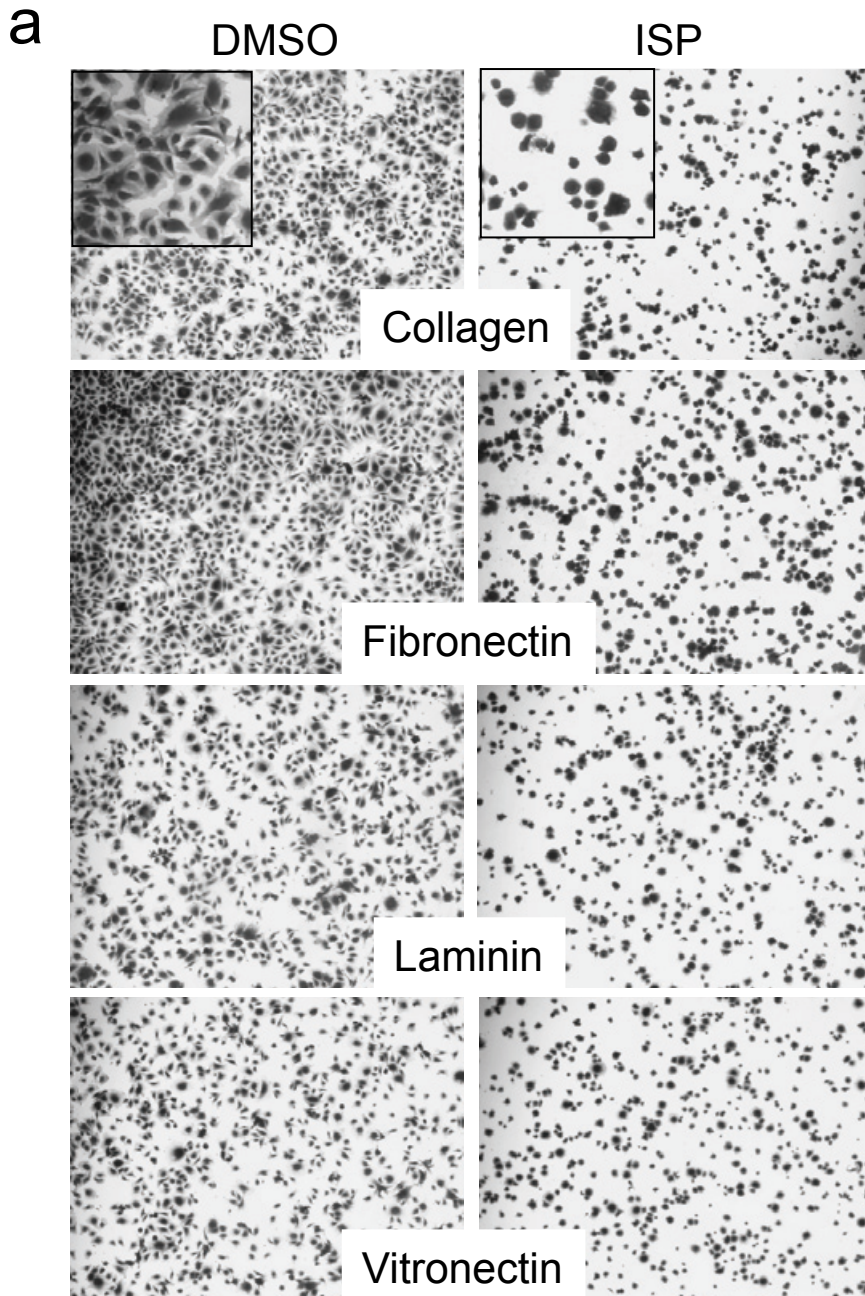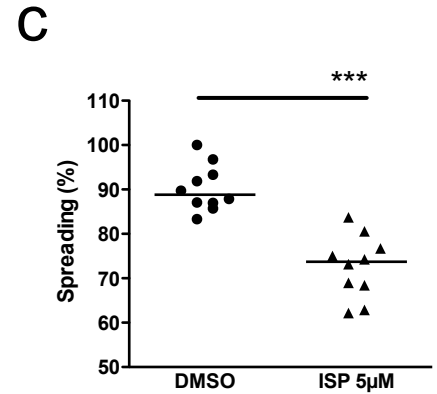

a) Inhibition of Eg5 by ispinesib reduces cell adhesion of endothelial cells plated on indicated matrix proteins b) Reorganization of the actin cytoskeleton: appearance of cortical actin and strong reduction of stress fibers (arrows and insert; bar in b=50µM) c) Cell spreading is reduced significantly after Eg5 blockade ( $p > 0.0001$ ).

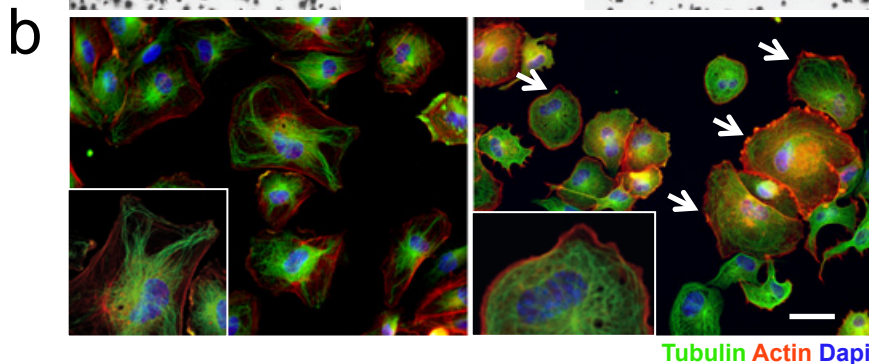

# Figure S10

Kinesin inhibition impairs migration of HUVECs

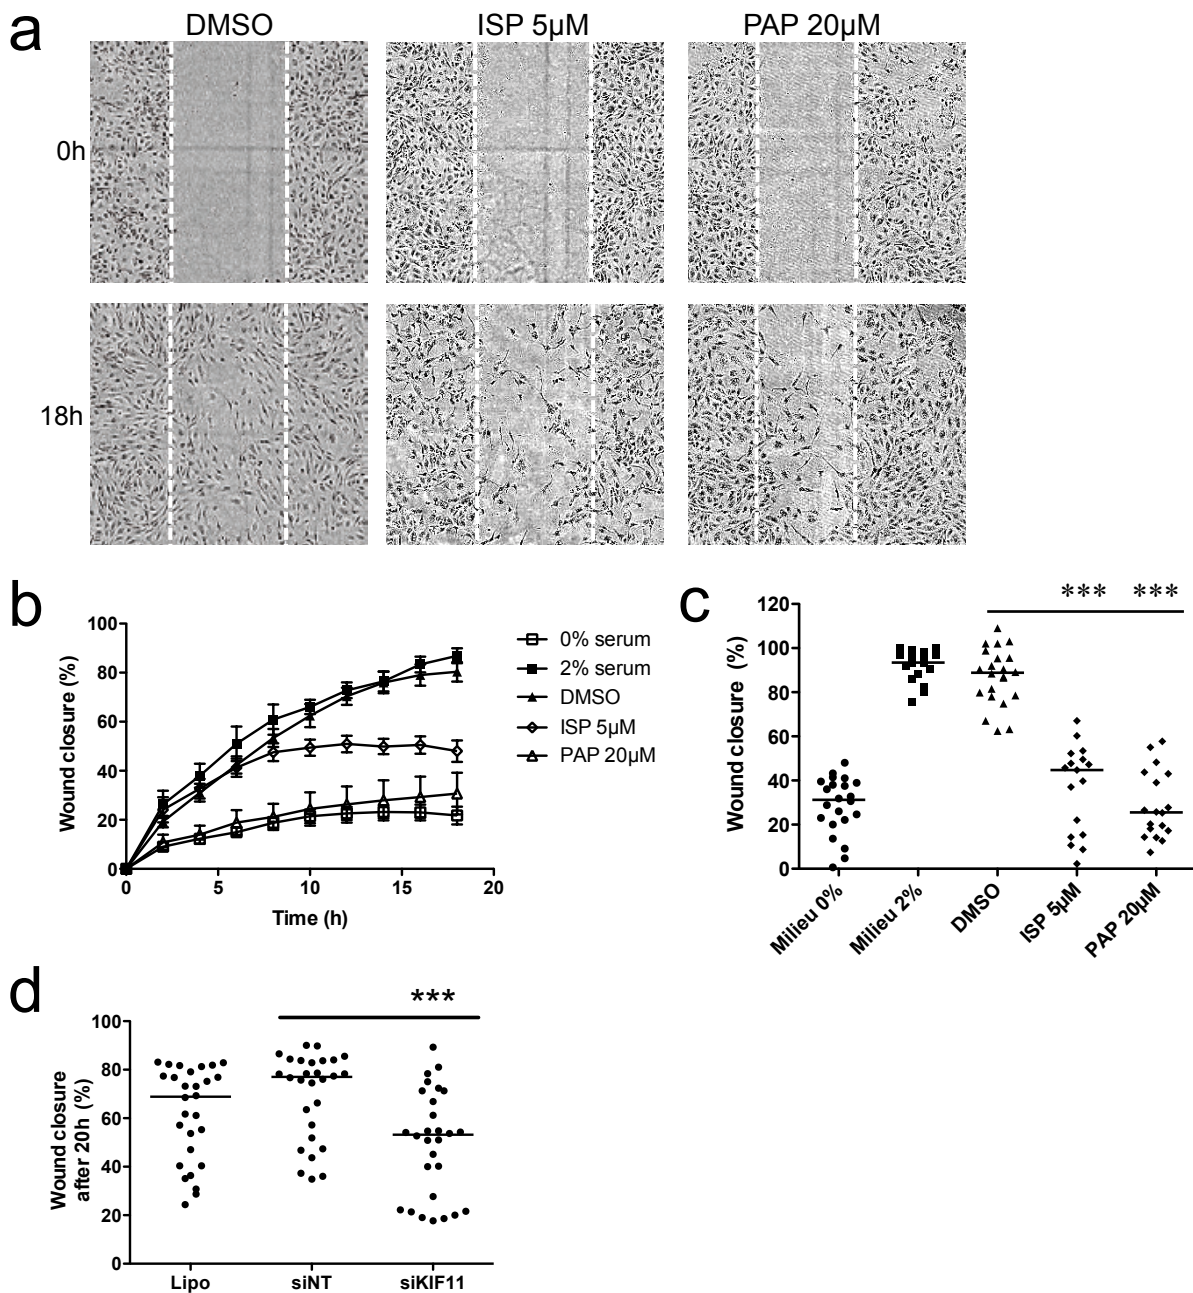

a) Representative pictures of HUVEC migration treated with indicated drugs at 0h and 18h after wounding. b) Quantification of cell migration into the wounded area over time. Percentage is indicated as mean $\pm$  SEM. Note strong inhibition of EC migration by ISP and PAP. c) For statistical analysis, four experiments were pooled and percentages of wound closure at the last time point were compared. ISP and PAP significantly block EC migration ( $P < 0.0001$ ). d) siRNA-mediated knock down of KIF11 also led to a significant reduction of endothelial cell migration ( $P = 0.0007$ ).



# Figure S11

Eg5 and Mklp2 blockade inhibits angiogenic sprouting in the mouse aortic ring assay

a

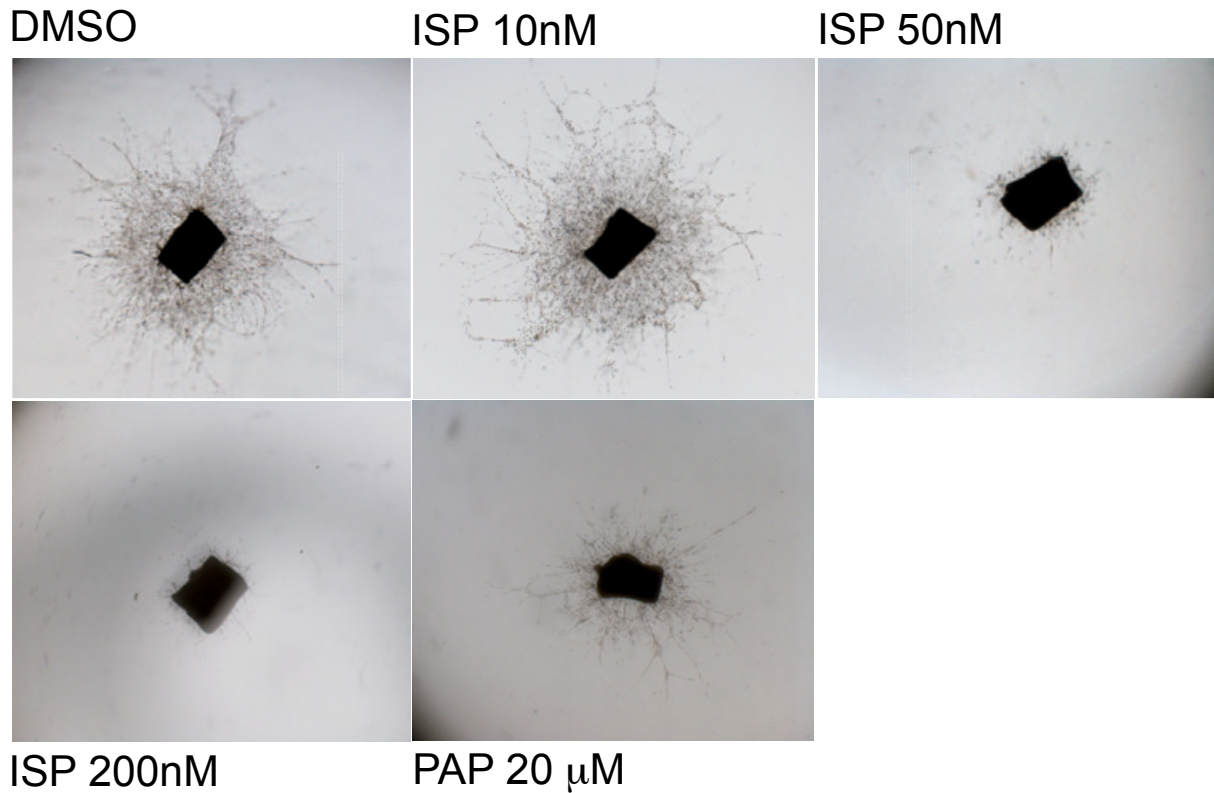

b

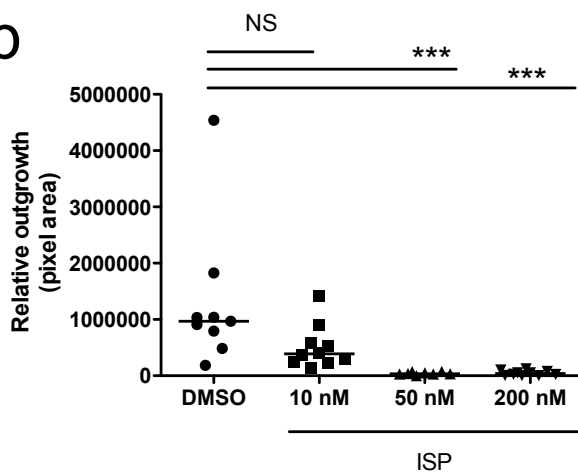

c

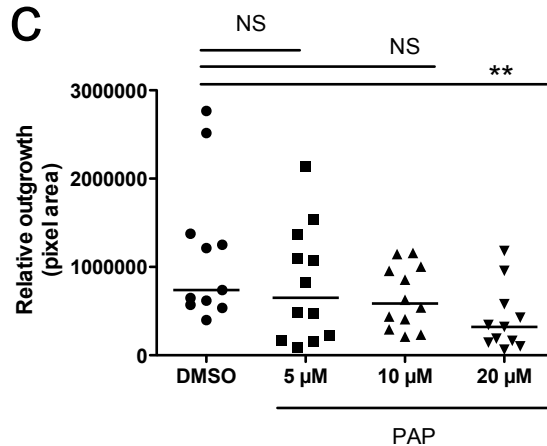

a) Representative pictures of mouse aortic rings in culture after 8 days. b) Quantification of cellular outgrowth around the aortic rings revealed significant reduction at doses around 50 nm for ispinesib and 20 μM for paprotrain.

# Figure S12

**a** Fluorescence *in situ* hybridization; 24 hpf

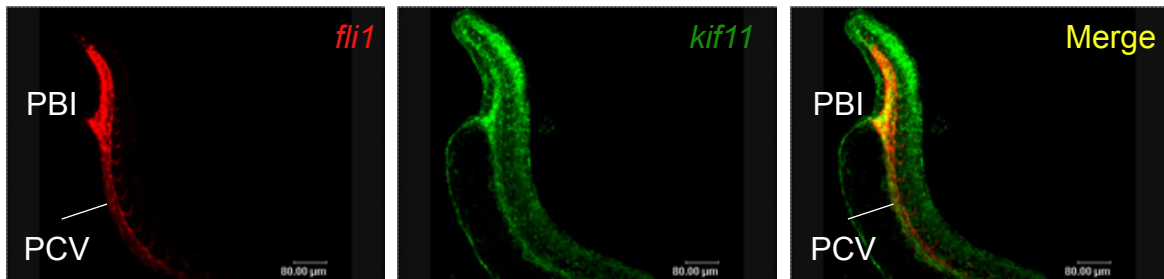

**b** Vascular defects in *kif11* Tg(kdrl:EGFP)<sup>s843</sup> morphants (48 hpf)

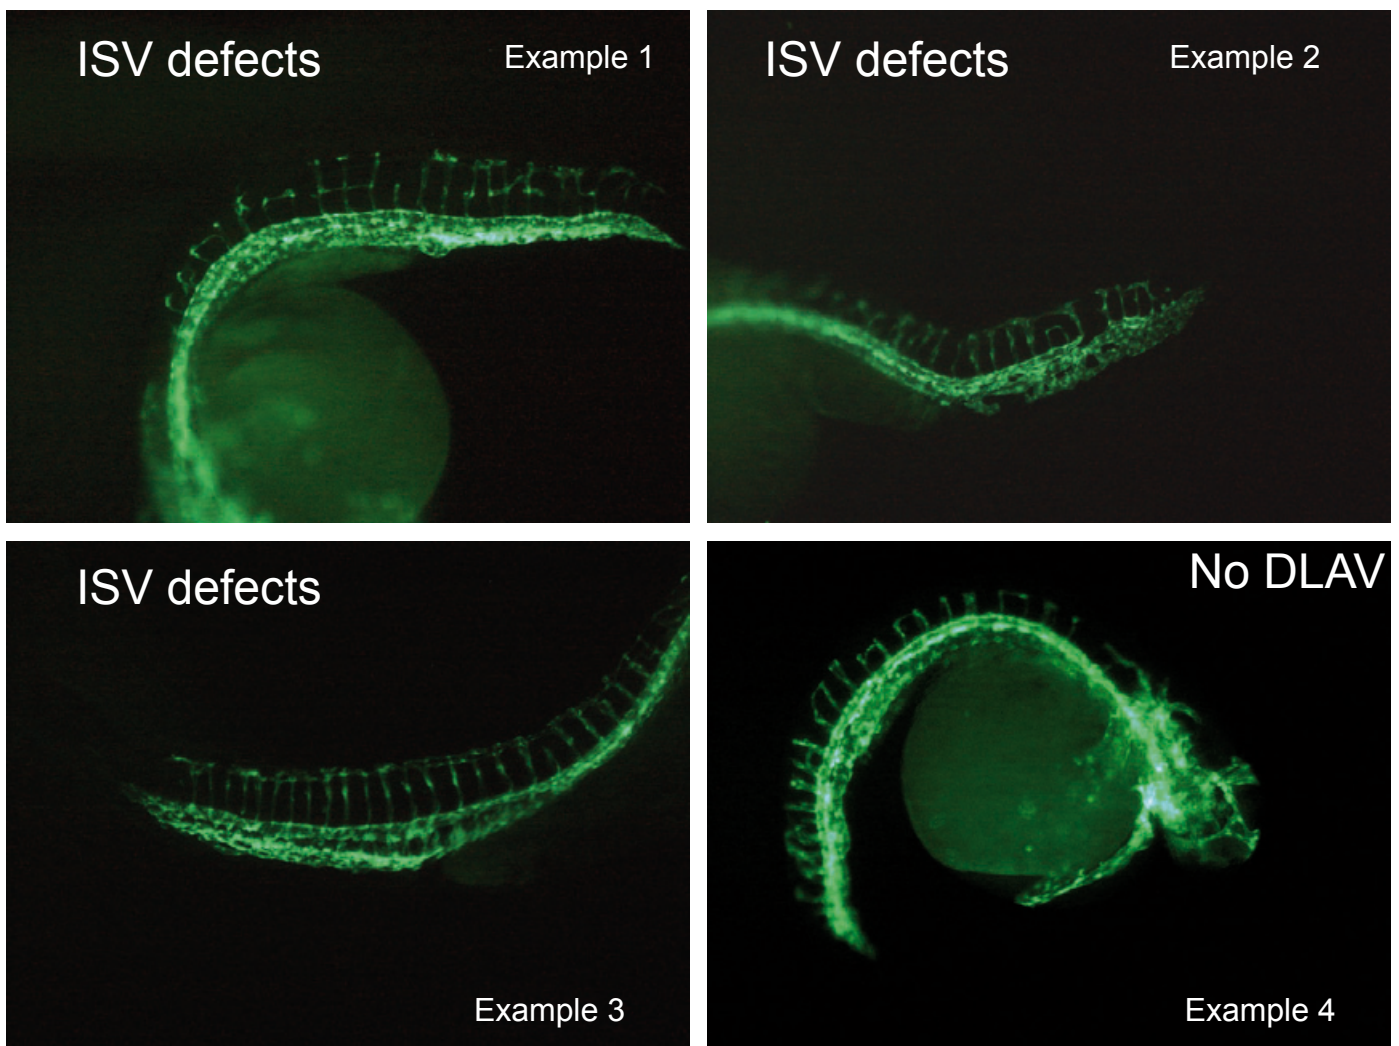

a) Zebrafish embryos at 24 hpf were hybridized with probes for the vascular/hematopoietic reporter transcript *fli1* (in red) or *kif11* mRNA (in green). Note that co-localisation occurs in the PBI and PCV. b) *kif11* knock-down embryos exhibited variable degrees of vascular malformation, mainly in the ISVs or the DLAV. Shown are four embryos with typical defects. Magnification x115.
